# Supplementary material
Source: PubMed Central journal article supplement (PMC2658040)

Supplemental Fig. 1 Fatty acid uptake is unchanged in mutant 2E1

WT and 2E1 mutant cells were assayed for uptake of  $^{14}\text{C}$ -palmitate for one minute at 37°C under basal (standard growth media) and lipotoxic (standard media supplemented with 500 $\mu\text{M}$  palmitate) conditions. Graph displays palmitate uptake per  $\mu\text{g}$  cellular protein and data is expressed as mean  $\pm$  SE for 3 independent experiments.

# Supplementary Figure 1

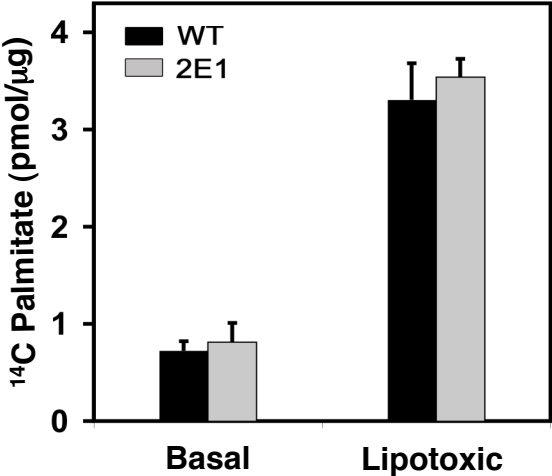

**Supplemental Fig. 2** gadd7 knockdown delays palmitate-induced ER stress.

Stable cell lines transfected with scrambled (SCR) and gadd7-targeted (KD1 and KD2) shRNAs were treated with palmitate for the indicated times.

**A.** Cell lysates were analyzed by Western blot for CHOP,  $\beta$ -actin, and phosphorylated (P-JNK) and total (T-JNK) proteins. A representative blot is shown.

**B.** Graph shows quantification of CHOP expression normalized to  $\beta$ -actin and data is expressed as mean  $\pm$  SE for 3 independent experiments, \*  $p < 0.05$  for KD vs. SCR.

**C.** Graph shows quantification of phosphorylated JNK1 and JNK2 normalized to total JNK1 and JNK2, respectively. Data expressed as mean  $\pm$  SE for 3 independent experiments, \*  $p < 0.05$  for KD vs. SCR.

# Supplemental Figure 2

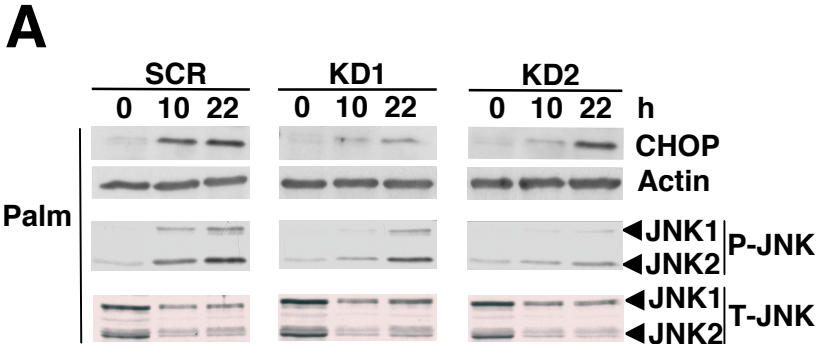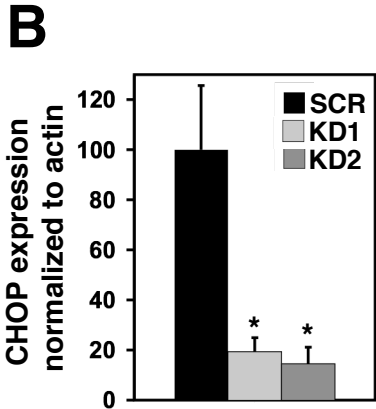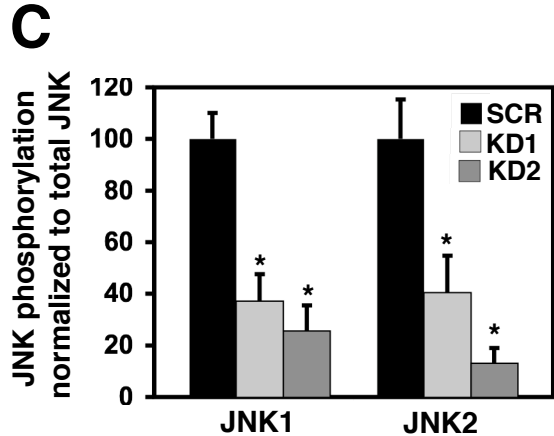

Supplement: M806209200_1.pdf [file M806209200_1.pdf]
